# Supplementary figures and images for: COMP-1 promotes competitive advantage of nematode sperm
Source: eLife journal article supplement (doi:10.7554/elife.05423), 2015-03-17

Figure 4 - figure supplement 1

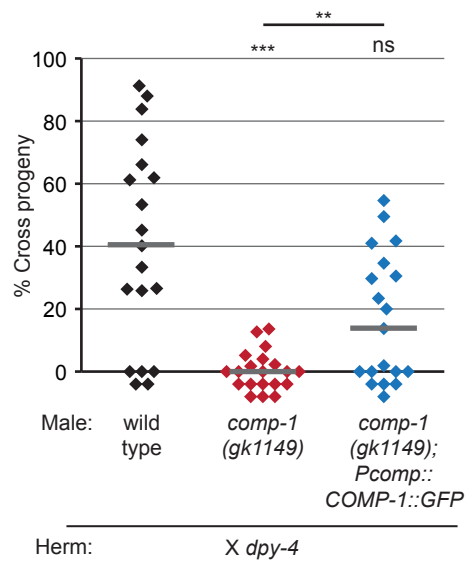

Supplement: supp [file elife-05423-supp-v1.zip]

**Figure 7 - figure supplement 1**

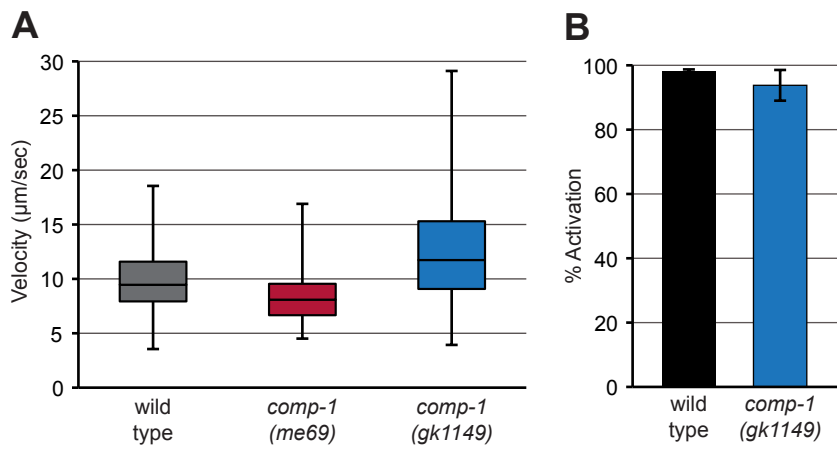

Supplement: supp [file elife-05423-supp-v1.zip]

Figure 2 - figure supplement 1

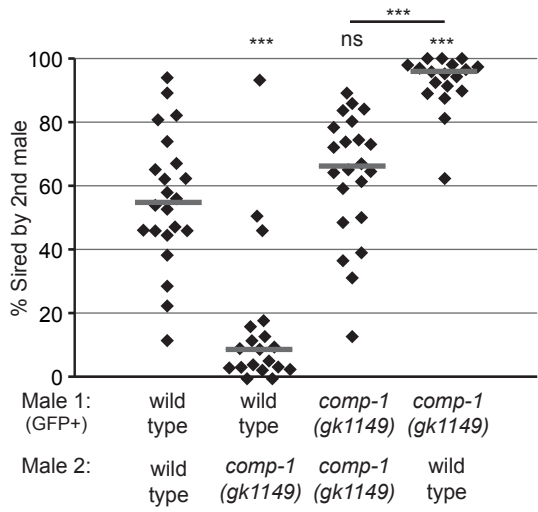

Supplement: supp [file elife-05423-supp-v1.zip]

**Figure 1 - figure supplement 2**

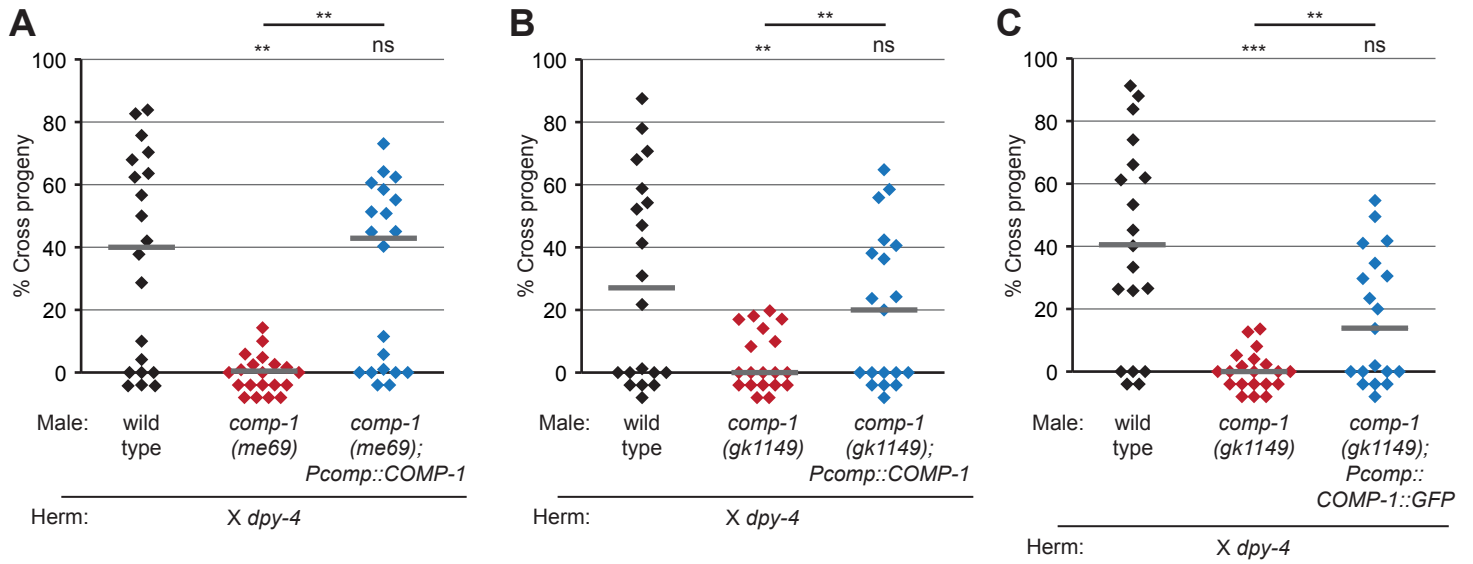

Supplement: supp [file elife-05423-supp-v1.zip]
